# Supplementary material for: Leucine-Enriched Essential Amino Acids Improve Recovery from Post-Exercise Muscle Damage Independent of Increases in Integrated Myofibrillar Protein Synthesis in Young Men
Source: PubMed Central journal article supplement (PMC7231404; doi:10.3390/nu12041061), 2020-04-11
Supplement: nutrients-12-01061-s001.pdf [file nutrients-12-01061-s001.pdf]

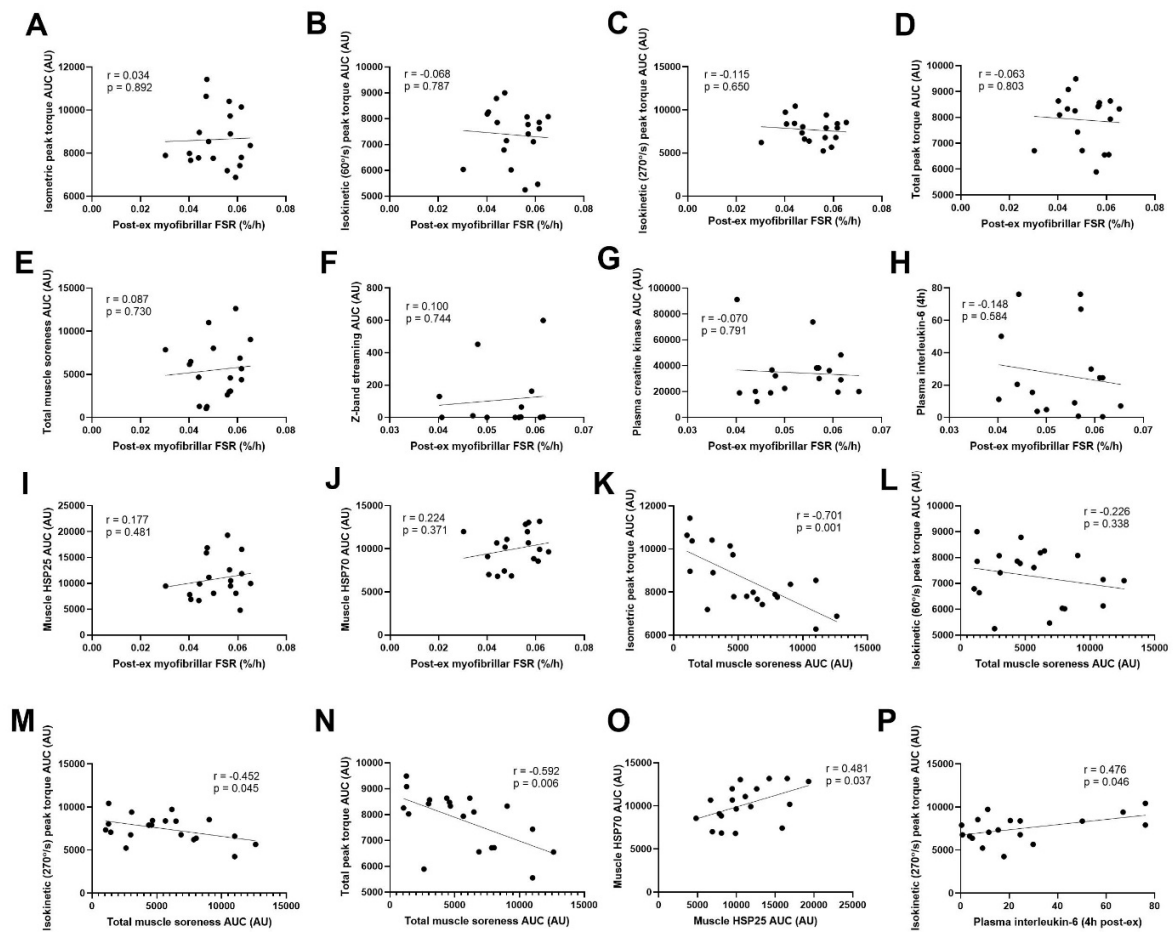

**Supplementary Material S1.** Linear correlations for select post-resistance exercise outcomes, including linear correlations between myofibrillar fractional synthetic rate and isometric peak torque (A), isokinetic 60°/s peak torque (B), isokinetic 270°/s peak torque (C), total peak torque (D), total muscle soreness (E), Z-band streaming (F), plasma creatine kinase activity (G), plasma interleukin-6 (H), muscle heat shock protein 25 (I), and muscle heat shock protein 70 (J), linear correlations between total muscle soreness and isometric peak torque (K), isokinetic 60°/s peak torque (L), and isokinetic 270°/s peak torque (M), and total peak torque (N), and linear correlations between muscle heat shock protein 25 and muscle heat shock protein 70 (O) and between plasma interleukin-6 and isokinetic 270°/s peak torque (P). Post-ex, 96h post-resistance exercise period; AUC, area under the curve; AU, arbitrary units.
